# Supplementary material for: High-performance Ruddlesden–Popper two-dimensional perovskite solar cells using integrated electron transport materials of tin oxide and indacenodithiophene
Source: Royal Society of Chemistry journal article supplement (doi:10.1039/d3ma00221g), 2023-01-01
Supplement: d3ma00221g1.pdf [file d3ma00221g1.pdf]

## Supporting Information for

# **High-performance Ruddlesden-Popper two-dimensional perovskite solar cells using integrated electron transport materials of tin oxide and indacenodithiophene**

Zhihai Liu,<sup>a</sup> Lei Wang,<sup>b</sup> Hao Zhao,<sup>a</sup> Yibin Wei,<sup>c</sup> Xiaoyin Xie<sup>\*d</sup> and Ping Chen<sup>\*a</sup>

<sup>a</sup>*School of Physics and Electronic Information, Yantai University, Yantai, 264005,*

*China, Email: [chenping@ytu.edu.cn](mailto:chenping@ytu.edu.cn)*

<sup>b</sup>*School of Artificial Intelligence, Beijing Technology and Business University, Beijing, 100048, China*

<sup>c</sup>*State Key Laboratory of High-efficiency Utilisation of Coal and Green Chemical Engineering, Ningxia University, Yinchuan 750021, China*

<sup>d</sup>*School of Chemistry and Chemical Technology, Hubei Polytechnic University, Huangshi 435003, China, Email: [xyxie@hbpu.edu.cn](mailto:xyxie@hbpu.edu.cn)*

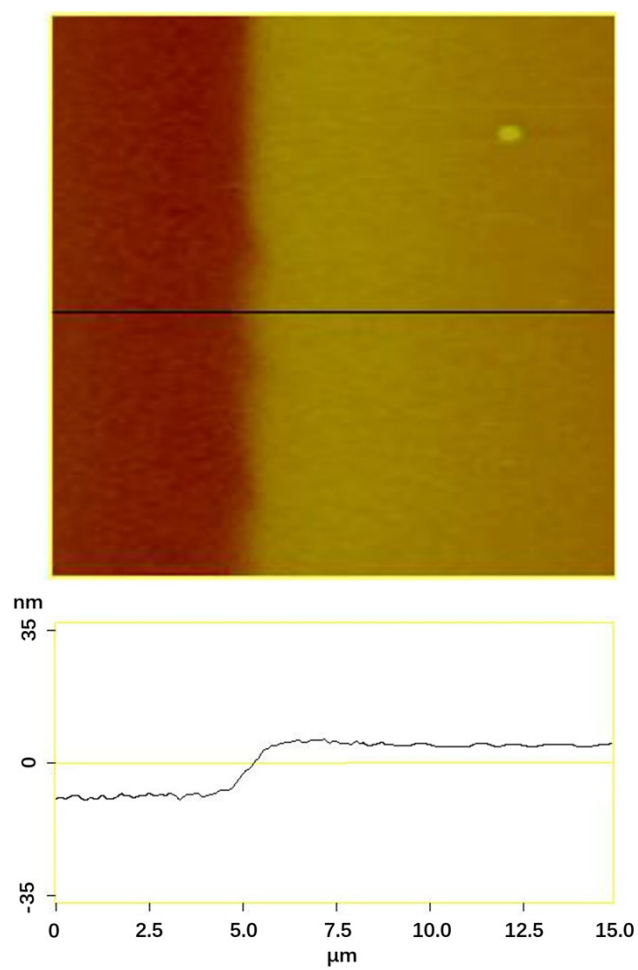

Fig. S1. AFM image for the surface of SnO<sub>2</sub>/IDIC, in which IDIC (left part) was coated under a speed of 1500 rpm.

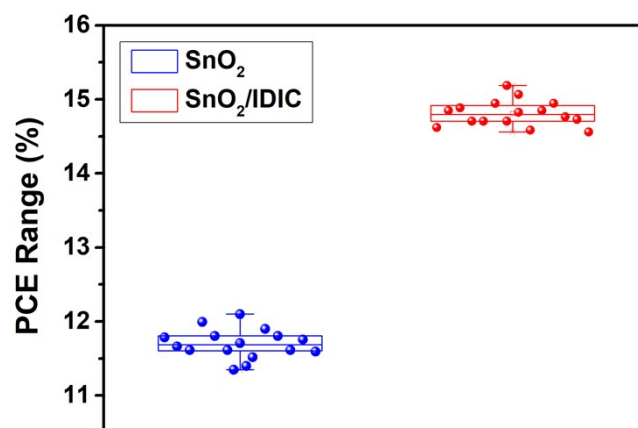

Fig. S2. PCE variations with standard deviations for PSCs without and with 1500 rpm processed IDIC films.

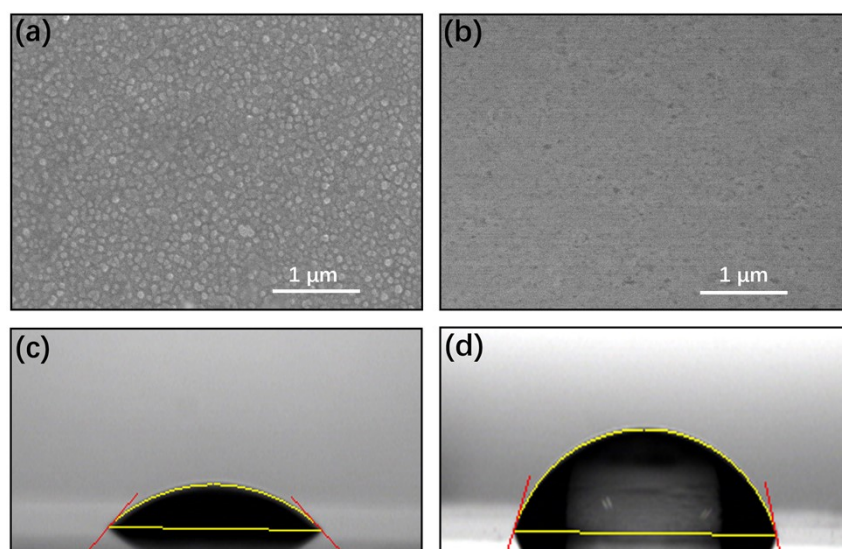

Fig. S3. Top-view SEM images of (a) bare SnO<sub>2</sub> and (b) SnO<sub>2</sub>/IDIC films; Water contact angle measurements of (c) bare SnO<sub>2</sub> and (d) SnO<sub>2</sub>/IDIC films.

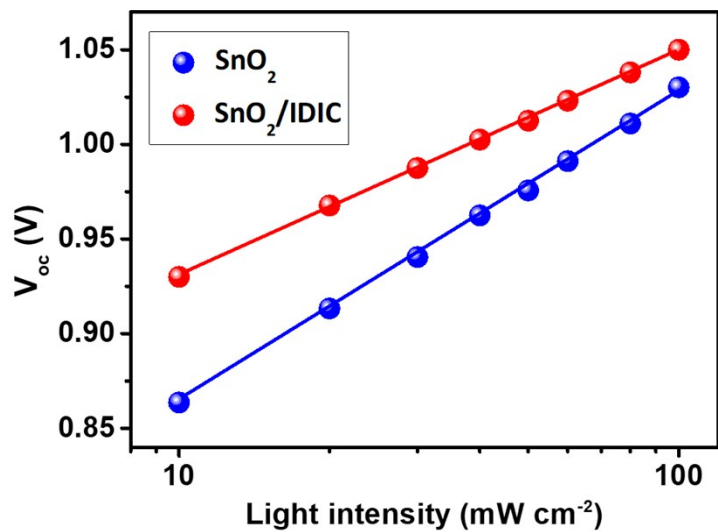

Fig. S4. Light intensity dependence of  $V_{oc}$  for PSCs using bare  $\text{SnO}_2$  and  $\text{SnO}_2/\text{IDIC}$  as the ETLs.

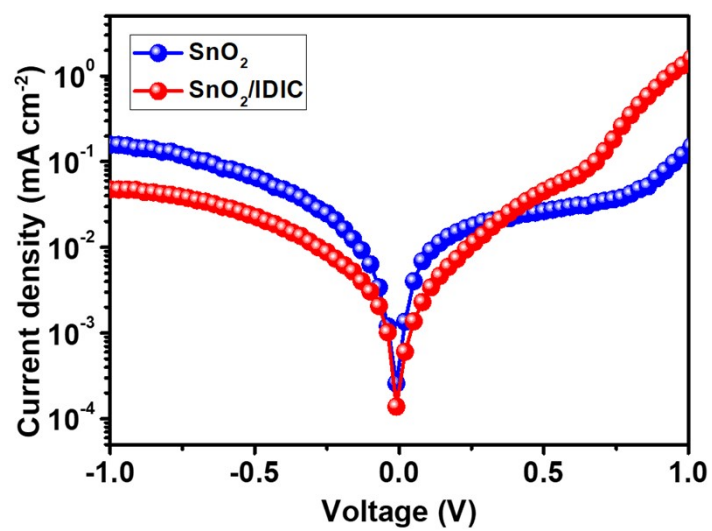

Fig. S5. Dark  $J$ - $V$  characteristics for PSCs using bare  $\text{SnO}_2$  and  $\text{SnO}_2/\text{IDIC}$  as the ETLs.

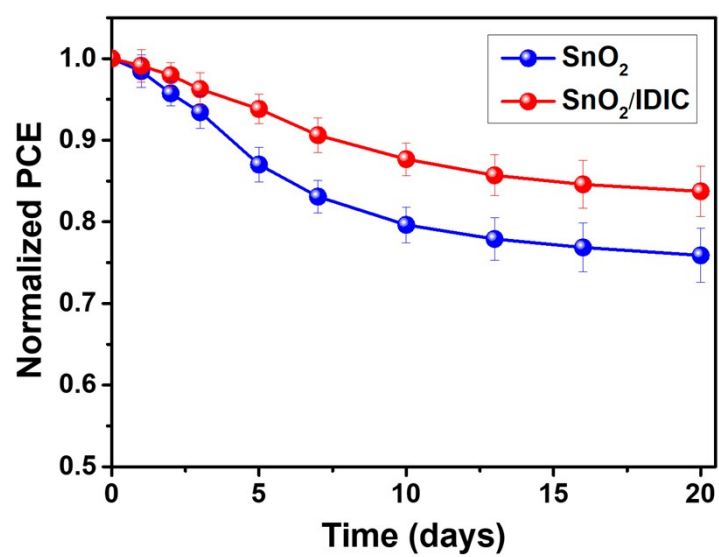

Fig. S6. Long-term stability test of the PSCs using bare SnO<sub>2</sub> or SnO<sub>2</sub>/IDIC as the ETLs, in terms of the normalized PCE as a function of time.
